# Supplementary material for: Copy Number Variation of CCL3-like Genes Affects Rate of Progression to Simian-AIDS in Rhesus Macaques (Macaca mulatta)
Source: PubMed Central journal article supplement (PMC2621346; doi:10.1371/journal.pgen.1000346), 2009-01-23
Supplement: pgen.1000346.s010.pdf [file pgen.1000346.s010.pdf]

**Table S3.** Summary statistics for *CCL3L* copy number distribution among primate species and populations.

| Population                                   | <i>n</i> | Mean  | SD    | Median |
|----------------------------------------------|----------|-------|-------|--------|
| Human (Yoruban [YRI])                        | 8        | 6.125 | 2.17  | 6.5    |
| Human (Chinese [CHI]+ Japanase [JPT])        | 8        | 6.5   | 2.45  | 6.5    |
| Chimpanzee                                   | 12       | 14.58 | 4.27  | 16     |
| Orangutan                                    | 7        | 4.57  | 0.976 | 5      |
| Rhesus macaque (Chinese – SIV free )         | 15       | 17.6  | 3.56  | 17     |
| Rhesus macaque (Chinese – SIV retrospective) | 20       | 13.9  | 6.40  | 12.5   |
| Rhesus macaque (Indian – SIV free)           | 16       | 9.44  | 3.4   | 10     |
| Rhesus macaque (Indian – SIV retrospective)  | 37       | 9.41  | 3.56  | 9.0    |
| African green monkey                         | 12       | 11.58 | 3.15  | 12     |
| Sooty Mangabey                               | 10       | 5.2   | 1.32  | 5      |
